# Supplementary material
Source: PubMed Central journal article supplement (PMC6166240)
Supplement: NIHMS1505945-supplement-1.pdf [file NIHMS1505945-supplement-1.pdf]

**Cell Reports, Volume 24**

**Supplemental Information**

**Intrinsic DNA Shape Accounts  
for Affinity Differences  
between Hox-Cofactor Binding Sites**

**Tim Zeiske, Nithya Baburajendran, Anna Kaczynska, Julia Brasch, Arthur G. Palmer III, Lawrence Shapiro, Barry Honig, and Richard S. Mann**

1 **Supplemental Tables and Figures:**

2

3 **Table S1. Crystallization conditions, related to Experimental Procedures**

| <b>Oligomer name</b> | <b>Oligomer sequence</b> | <b>Final condition</b>                                                               |
|----------------------|--------------------------|--------------------------------------------------------------------------------------|
| red14                | GCATGATTTATGAC           | 200 mM MgCl <sub>2</sub> ,<br>0.1M Tris pH:5.8,<br>17.5% PEG 4000<br>5% glycerol     |
| blue14               | GCATGATTAATGAC           | 200 mM MgCl <sub>2</sub> ,<br>0.1 M Tris pH:5.8,<br>17.5% PEG 3350,<br>2.5% glycerol |
| magenta14*           | GCATGATTTACGAC           | 90 mM MgCl <sub>2</sub><br>0.1 M Tris pH:9.0<br>22% PEG 3350,                        |
| black14*             | GCATGATAAATGAC           | 0.1 M Sodium citrate pH 5.3,<br>25% PEG 3350,                                        |

4 \* The original protein sample contained 50 mM MgCl<sub>2</sub>

5

6

7 **Table S2. Data collection and refinement statistics, related to Figure 1**

|                                     | Red                    | Magenta                | Blue                   | Black                  |
|-------------------------------------|------------------------|------------------------|------------------------|------------------------|
| <b>DATA COLLECTION</b>              |                        |                        |                        |                        |
| <b>Resolution range (Å)*</b>        | 29.9 - 2.4 (2.5 - 2.4) | 44.9 - 3.0 (3.1 - 3.0) | 28.1 - 2.9 (3.0 - 2.9) | 63.5 - 2.4 (2.5 - 2.4) |
| <b>Space group</b>                  | C 1 2 1                | C 1 2 1                | C 1 2 1                | P 1                    |
| <b>Unit cell</b>                    |                        |                        |                        |                        |
| a, b, c (Å)                         | 77.1 49.4 95.2         | 77.3 49.5 95.1         | 77.7 49.7 96.8         | 45.4 45.6 66.9         |
| α, β, γ (°)                         | 90 109.3 90            | 90 109.2 90            | 90 109.0 90            | 99.1 100.4 114.2       |
| <b>Unique reflections*</b>          | 12413 (980)            | 6678 (624)             | 7524 (640)             | 16923 (1662)           |
| <b>Multiplicity</b>                 | 3.4                    | 3.6                    | 1.9                    | 2.0                    |
| <b>Completeness (%)*</b>            | 97.33 (77.0)           | 98.61 (92.6)           | 94.74 (83.2)           | 93.06 (92.8)           |
| <b>Mean I/sigma(I)*</b>             | 18.49 (1.92)           | 6.0 (1.70)             | 9.16 (1.75)            | 6.8 (2.00)             |
| <b>R-merge*</b>                     | 0.065 (0.539)          | 0.237 (0.629)          | 0.172 (0.852)          | 0.169 (0.706)          |
| <b>REFINEMENT</b>                   |                        |                        |                        |                        |
| <b>R-work*</b>                      | 0.223 (0.319)          | 0.269 (0.344)          | 0.253 (0.376)          | 0.232 (0.294)          |
| <b>R-free*</b>                      | 0.252 (0.358)          | 0.288 (0.373)          | 0.281 (0.411)          | 0.276 (0.364)          |
| <b>Number of non-hydrogen atoms</b> | 1731                   | 1660                   | 1586                   | 2852                   |
| <b>macromolecules</b>               | 1688                   | 1660                   | 1583                   | 2772                   |
| <b>water</b>                        | 43                     | 0                      | 3                      | 80                     |
| <b>Protein residues</b>             | 164                    | 166                    | 158                    | 249                    |
| <b>RMS(bonds)</b>                   | 0.007                  | 0.003                  | 0.004                  | 0.003                  |
| <b>RMS(angles)</b>                  | 0.90                   | 0.55                   | 0.70                   | 0.47                   |
| <b>Ramachandran favored (%)</b>     | 98                     | 95                     | 95                     | 96                     |
| <b>Ramachandran outliers (%)</b>    | 0                      | 0                      | 0                      | 0                      |

8 Statistics for the highest-resolution shell are shown in parentheses.

9 \* Values in parentheses are for the highest resolution shell.

10 ‡ Ions were modeled as waters

11

12 **Table S3: AbdB and Exd interaction surface areas and H-bonds, related to Figure 1**

| Chain interface | Area (Å <sup>2</sup> ); H-bonds (#) |            |           |            |         |
|-----------------|-------------------------------------|------------|-----------|------------|---------|
|                 | Red                                 | Magenta    | Blue      | BlackF     | BlackR  |
| AbdB:DNA        | 910.1; 21                           | 943.6; 18  | 885.1; 23 | 918; 20    | 972; 20 |
| Exd:DNA         | 1069.5; 25                          | 1073.1; 20 | 863.5; 8  | 1052.4; 19 | NA      |
| AbdB:Exd        | 249.1; 1                            | 163.9; 0   | 138.2; 0  | 278.3; 1   | NA      |

13

14 All values were obtained with the PISA program within CCP4 (PISA; (Krissinel and Henrick,  
15 2007)) (Collaborative Computational Project, 1994; Winn et al., 2011).

16

17 **Table S4. Protein expression and purification conditions, related to Experimental**  
18 **Procedures.**

|                                            | Batch I                                                                                           | Batch II                                                                                                  |
|--------------------------------------------|---------------------------------------------------------------------------------------------------|-----------------------------------------------------------------------------------------------------------|
| Lysis buffer                               | 50mM Tris pH 8.0, 300mM NaCl, 1% Triton X-100, 10% glycerol, 1mM PMSF, protease inhibitor (Roche) | 50 mM Tris pH 7.5, 500 mM NaCl, 1 mM TCEP, 20 mM Imidazole, lysozyme, DNase I, protease inhibitor (Roche) |
| Ni equilibration buffer                    | 50mM Tris pH 8.0, 100mM NaCl, 1mM PMSF, protease inhibitor (Roche)                                | 50 mM Tris pH 7.5, 500 mM NaCl, 1 mM TCEP, 20 mM Imidazole                                                |
| Ni elution buffer                          | 250mM Imidazole pH 8.0, 10mM Tris pH 8.0, 100 mM NaCl, protease inhibitor (Roche)                 | 50 mM Tris pH 7.5, 500 mM NaCl, 1 mM TCEP, 500 mM Imidazole                                               |
| Gel filtration buffer/Final storage buffer | 10 mM Tris pH.8.0, 200 mM Nacl and 2 mM TCEP                                                      | 10 mM TRIS pH 7.5, 200 mM NaCl, 2 mM TCEP, 50 mM MgCl <sub>2</sub>                                        |

19

20

21

22

23

24

25

26

27 **Table S5. Oligos used in the competition EMSA experiments, related to Experimental**  
28 **Procedures.**

| <b>Core motif</b> | <b>Oligo sequence</b>            |
|-------------------|----------------------------------|
| Red               | acgctctggGCATGATTTATGACccacgtctc |
| Magenta           | acgctctggGCATGATTTACGACccacgtctc |
| Blue              | acgctctggGCATGATTAATGACccacgtctc |
| Black             | acgctctggGCATGATAAATGACccacgtctc |

29  
30  
31

32 **Figure S1. Composite omit maps confirm key structural features, related to Figure 1.**

33

34 (A) Stick representations of the Red, Magenta, Blue, BlackF and BlackR DNAs present in the  
35 respective crystal structures. The composite omit maps (with anneal mode) are displayed in  
36 grey mesh and contoured at  $1.0\sigma$ . The coordinates of the DNA were deleted while making the  
37 composite omit maps to avoid model bias.  
38

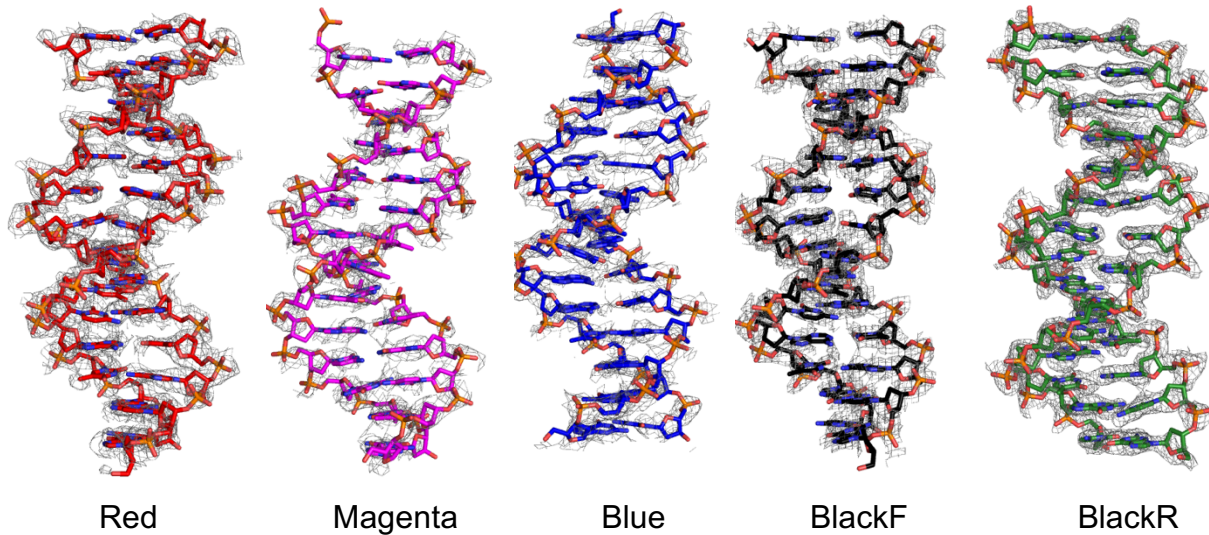

39

40

41

42

43 (B) NTA residues of AbdB from the Red structure as seen in Figure 2, panel C, in stick  
44 representation with the composite omit (with anneal mode) map displayed in grey mesh  
45 contoured at  $1.0\sigma$ .

46

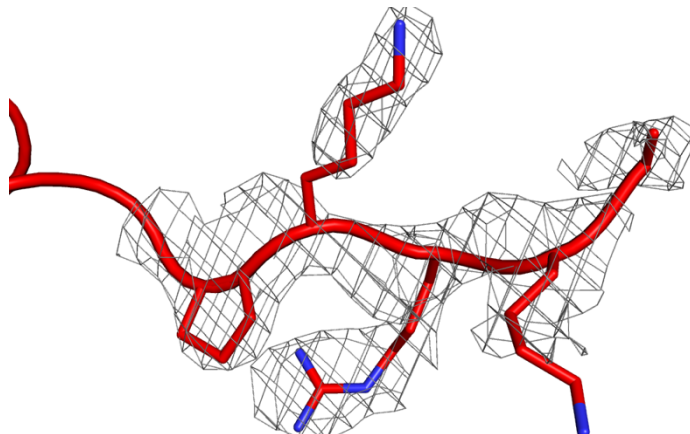

47

48  
49  
50

**Figure S2. Schematic summarizing protein-DNA contacts for all five complexes using DNAProDB (Sagendorf et al., 2017), related to Figure 1.**

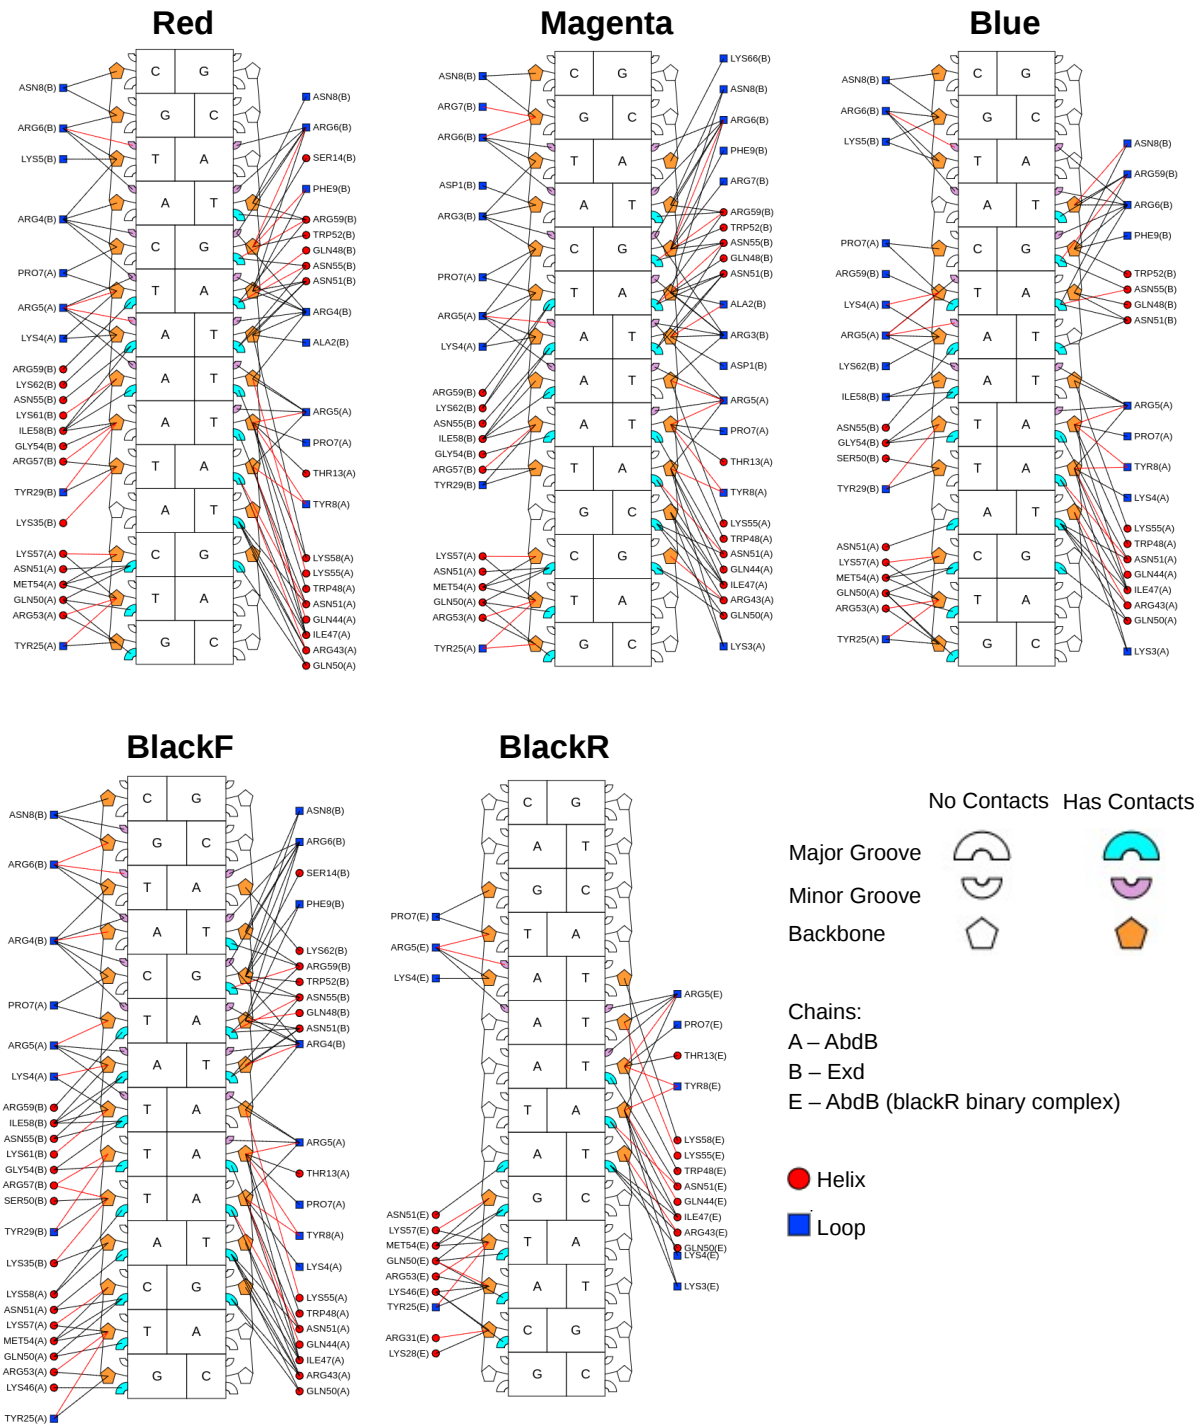

51  
52  
53

54 **Figure S3. Comparison of NTA backbone paths of the red complex with HoxB1 and Ubx,**  
55 **related to Figure 2.**

56  
57 *Left.* Ubx's NTA has a similar path as other posterior Hox proteins such as AbdB's, but differs  
58 from Scr's NTA.

59  
60 *Right.* HoxB1's NTA is unique, but most similar to Scr's NTA, and its Thr6 also contacts the  
61 phosphate backbone.

62

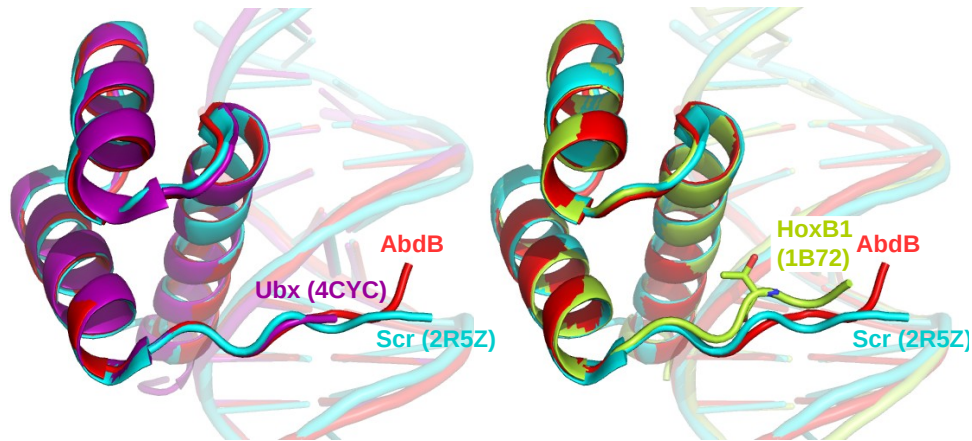

63

64



65 **Figure S4. Comparison of helix 4 of Exd for all four AbdB-Exd ternary structures,**  
66 **showing its proximity to the W-motif-TALE interaction, related to Figure 5.**

67  
68  
69

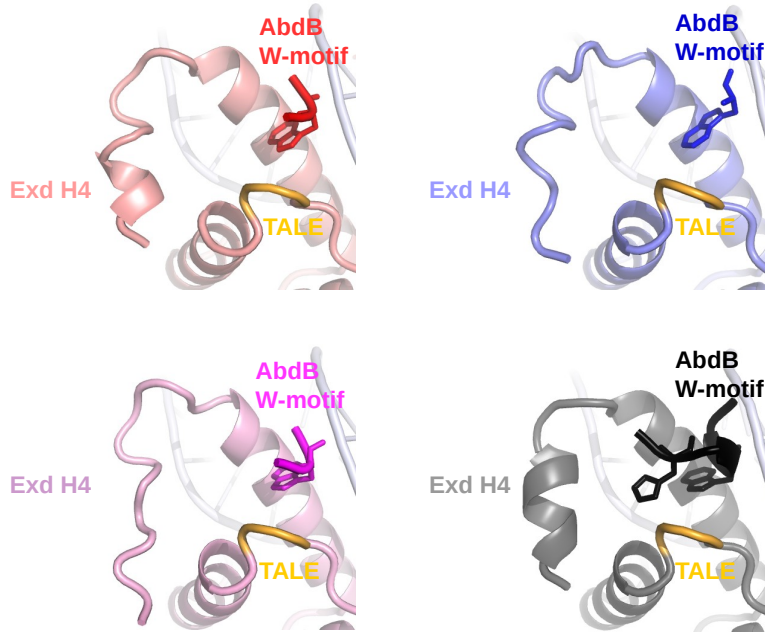

70  
71  
72  
73  
74  
75  
76  
77  
78  
79  
80  
81  
82  
83  
84  
85  
86  
87  
88

**References:**

Collaborative Computational Project, N. (1994). The CCP4 suite: programs for protein crystallography. *Acta Crystallogr D Biol Crystallogr* 50, 760-763.

Krissinel, E., and Henrick, K. (2007). Inference of macromolecular assemblies from crystalline state. *J Mol Biol* 372, 774-797.

Sagendorf, J.M., Berman, H.M., and Rohs, R. (2017). DNAProDB: an interactive tool for structural analysis of DNA-protein complexes. *Nucleic Acids Res* 45, W89-W97.

Winn, M.D., Ballard, C.C., Cowtan, K.D., Dodson, E.J., Emsley, P., Evans, P.R., Keegan, R.M., Krissinel, E.B., Leslie, A.G.W., McCoy, A., *et al.* (2011). Overview of the CCP 4 suite and current developments. *Acta Crystallographica Section D Biological Crystallography* 67, 235-242.
